# Supplementary material for: Fasting-mimicking diet remodels gut microbiota and suppresses colorectal cancer progression
Source: Springer Nature journal article supplement (doi:10.1038/s41522-024-00520-w), 2024-06-25
Supplement: MOESM1 [file 41522_2024_520_MOESM1_ESM.pdf]

1 **Supplementary data**

2

| qPCR                           | Forward primer          | Reverse primer          |
|--------------------------------|-------------------------|-------------------------|
| <i>Lactobacillus murinus</i>   | TCGAACGAAACTTCTTTATCACC | CGTTCGCCACTCAACTCTTT    |
| <i>Lactobacillus johnsonii</i> | TCGAGCGAGCTTGCCTAGATGA  | TCCGGACAACGCTTGCCACC    |
| <i>Lactobacillus Universal</i> | GAGGCAGCAGTAGGGAATCTTC  | CCAGCGTTGCCACCTACGTA    |
| <i>Eubacteria 16S</i>          | CGGCAA CGAGCGCAACCC     | CCATTGTAGCACGTGTGTAG CC |
| Tumor necrosis factor alpha    | CTGAACTTCGGGGTGATCGG    | GGCTTGTCACTCGAATTTTGAGA |
| Interferon gamma               | GCCACGGCACAGTCATTGA     | TGCTGATGGCCTGATTGTCTT   |

3 **Supplementary Table 1.** Primers for bacteria and cytokines.

4

5 **Supplementary Figure.**

6

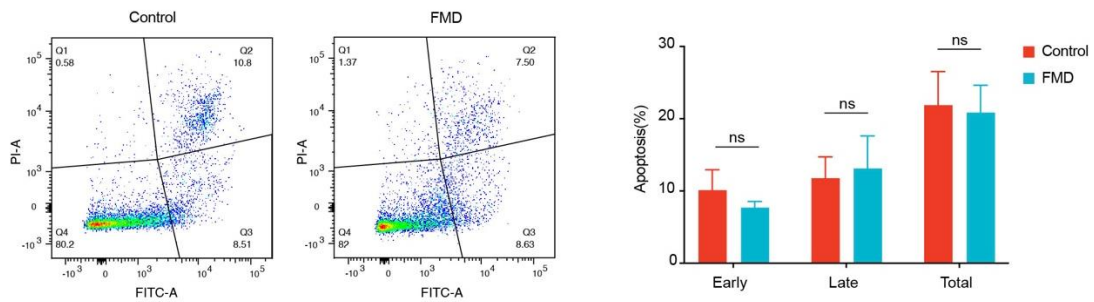

7

8 **Supplementary Figure 1.** Early, late, and total cell apoptosis of CRC tumor cells using Annexin V-  
9 FITC/PI staining. Control: n=5; FMD: n=5.

10

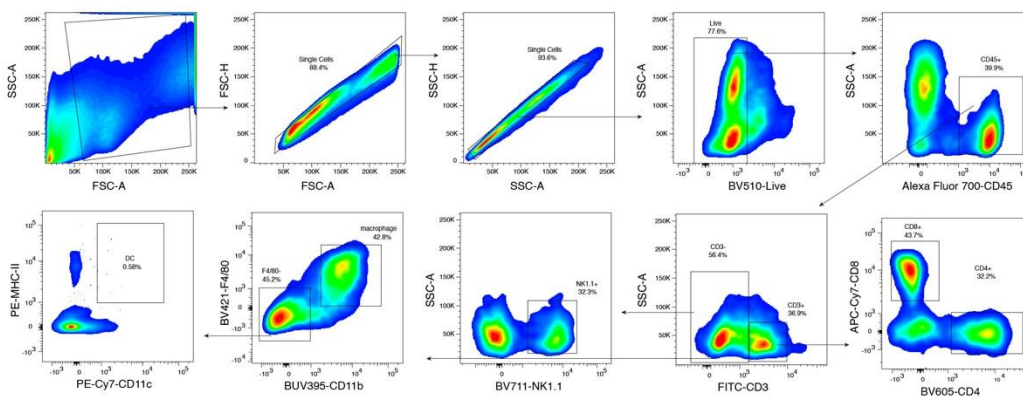

11

12 **Supplementary Figure 2.** Flow cytometry gating strategy of CD45<sup>+</sup> cells, CD8<sup>+</sup> T cells, CD4<sup>+</sup> T cells,  
13 NK cells, DC cells and macrophage.

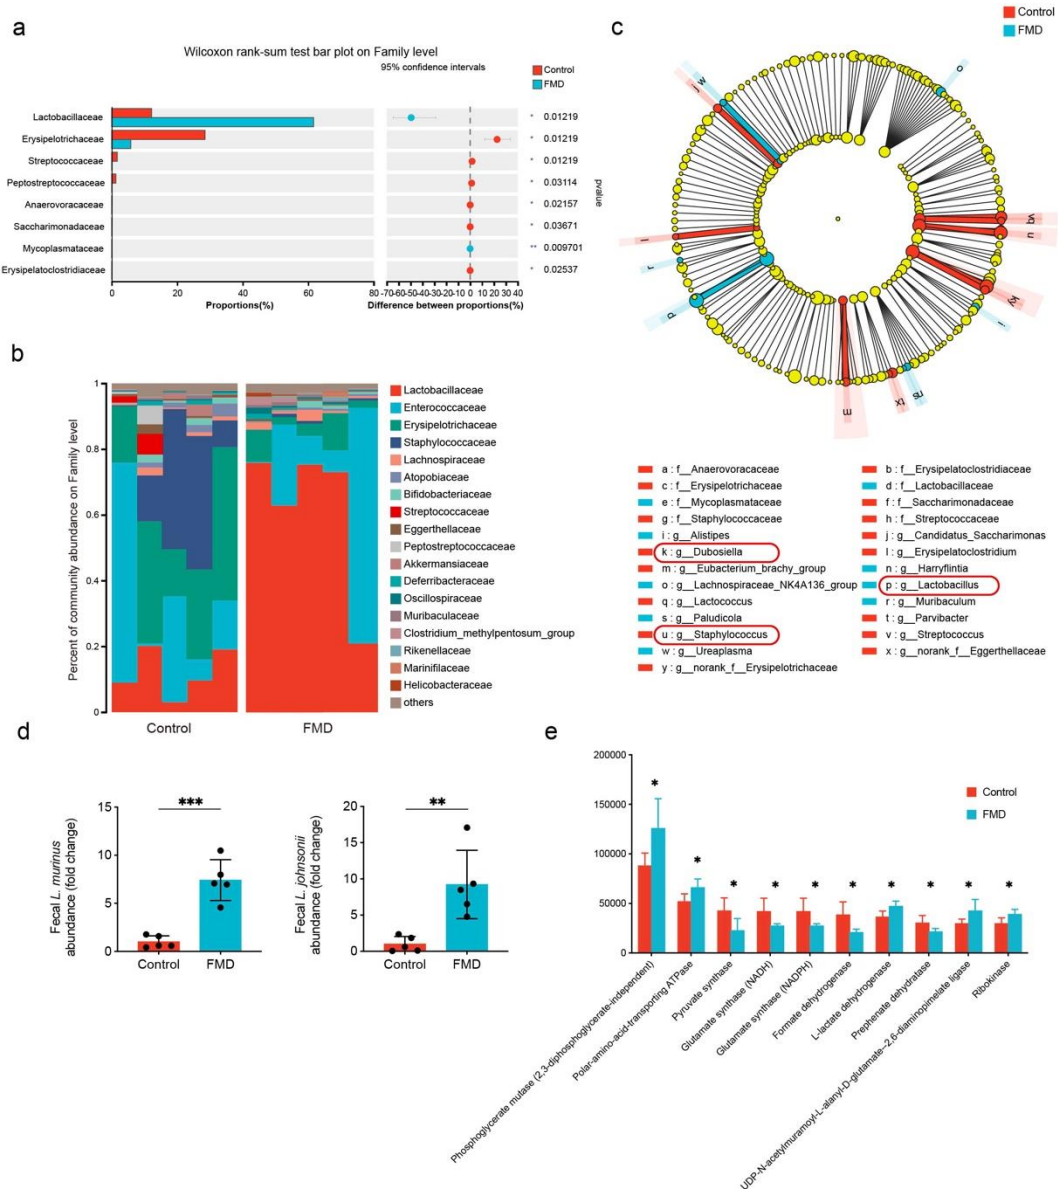

14  
 15 **Supplementary Figure 3.** FMD changed gut microbiota composition. **a.** Significant species alterations  
 16 in control and FMD groups on family level. **b.** Plot summarizing the percentage community of abundance  
 17 of microbial families in fecal samples from the control and FMD groups. **c.** LefSe used to identify the  
 18 differentially expressed bacterial taxa in two groups (family to genus level); the size and color of circles  
 19 indicate the abundance of the bacterial. **d.** qPCR verification of fecal abundance of *L. johnsonii* and *L.*  
 20 *murinus*. **e.** PICRUSt2 prediction of KEGG enzyme abundance from 16S rRNA, showing the top 10  
 21 most abundant enzymes. \* $p < 0.05$ , \*\* $p < 0.01$ , \*\*\* $p < 0.001$ .  
 22

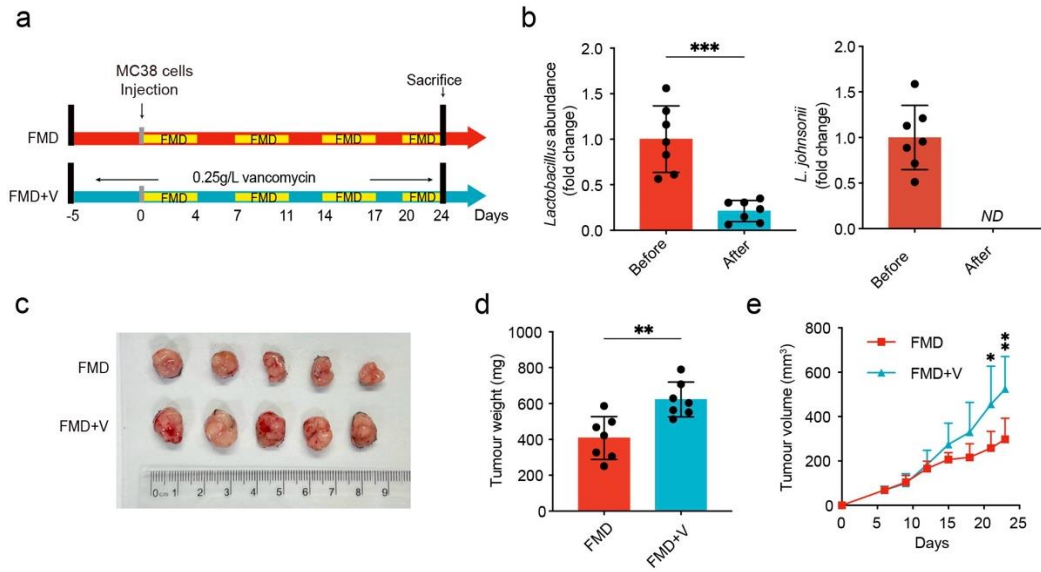

23

24 **Supplementary Figure 4.** The role of *Lactobacillus* and *L. johnsonii* in modulating tumor growth during  
 25 FMD. **a.** Schematic diagram of FMD and vancomycin regimen. **b.** qPCR verification of fold change of  
 26 *Lactobacillus* and *L. johnsonii* after vancomycin treatment before FMD started. **c.** MC38 cells were  
 27 injected subcutaneously into C57BL/6 mice. Image of dissected tumors at day 24. Upper: FMD group;  
 28 lower: FMD + vancomycin group. **d.** Tumor weight on day of sacrifice. **e.** Average tumor volume  
 29 measured after MC38 cells injection. FMD group: n=7; FMD+V: n=7. Student t test. Data are shown in  
 30 mean  $\pm$  SD. \*p < 0.05, \*\*p < 0.01, \*\*\*p < 0.001.
